# Supplementary material
Source: MDPI journal article supplement (https://www.mdpi.com/2227-9040/11/7/390)
Supplement: s1 [file s1]

# **Microplasma-Enabled Sustainable Synthesis of Nitrogen-Doped Graphene Quantum**

## **Dots for Sensitive Detection of 4-Nitrophenol**

(Supporting Information)

Michael Ryan Rahardja, Darwin Kurniawan and Wei-Hung Chiang \*

Department of Chemical Engineering, National Taiwan University of Science and  
Technology, Taipei 10607, Taiwan

\*Correspondence: [whchiang@mail.ntust.edu.tw](mailto:whchiang@mail.ntust.edu.tw)

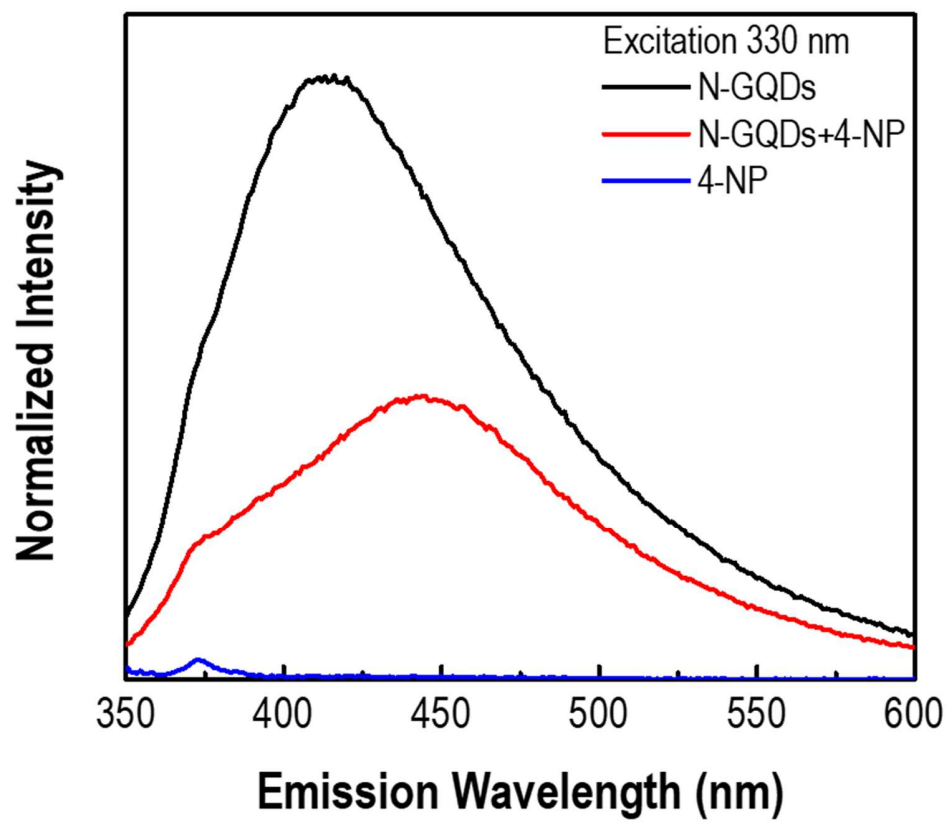

**Figure S1.** PL spectra of N-GQDs (black), N-GQDs in the presence of 4-NP (red), and 4-NP (blue).

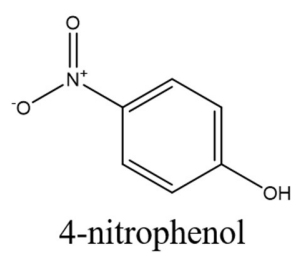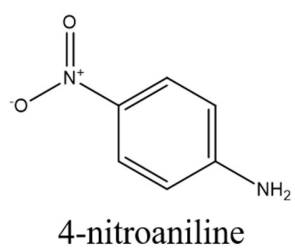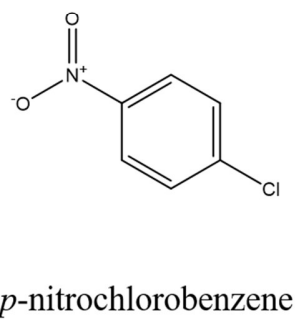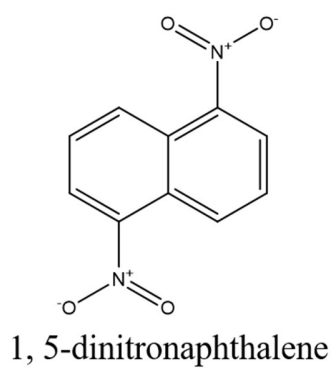

**Figure S2.** Chemical structure of several nitroaromatic compounds.

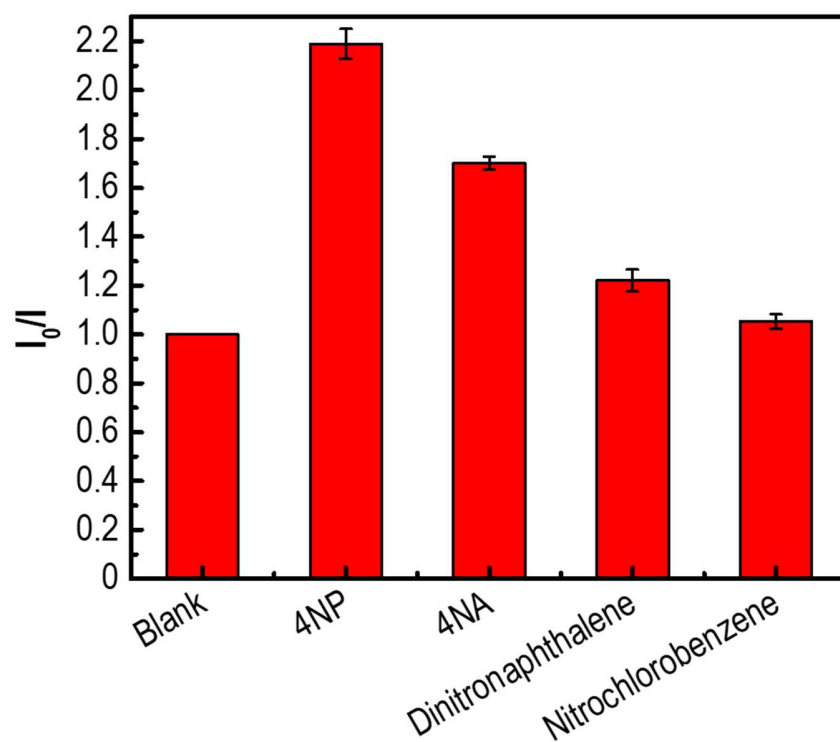

**Figure S3.** PL quenching ratio of N-GQDs in the presence of 50  $\mu$ M different nitroaromatic compounds. The excitation used was 330 nm.

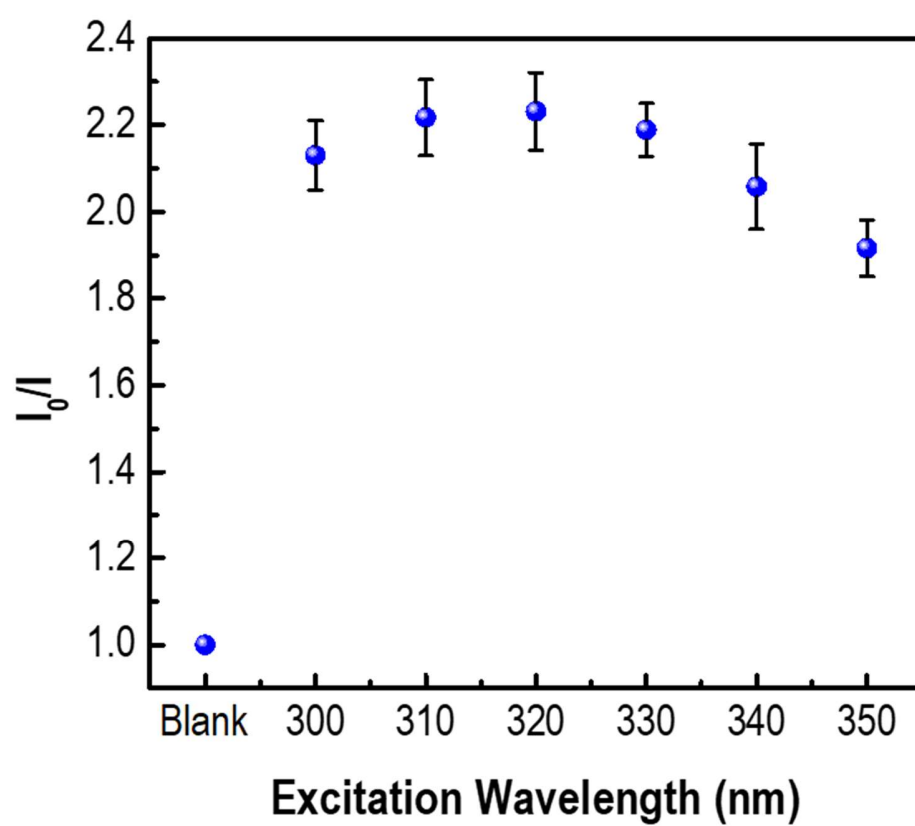

**Figure S4.** PL quenching ratio of N-GQDs in the presence of 50  $\mu$ M 4-NP under different excitation wavelengths.
